# Supplementary material for: MitoQ Is Able to Modulate Apoptosis and Inflammation
Source: MDPI journal article supplement (doi:10.3390/ijms22094753), 2021-04-30
Supplement: s1 [file s1]

**Supplementary Table S1.** Pro-inflammatory cytokines profile of DAOY cells after 24 and 48 hours of treatment.

| Cytokine<br>(pg/ml)           | Stimulus | 24 h                                                 |                                                      |                                                      |                                                      | 48 h                                                 |                                                      |                                                      |                                                      |
|-------------------------------|----------|------------------------------------------------------|------------------------------------------------------|------------------------------------------------------|------------------------------------------------------|------------------------------------------------------|------------------------------------------------------|------------------------------------------------------|------------------------------------------------------|
|                               |          | Untr                                                 | Lova                                                 | MitoQ+<br>Lova                                       | MitoQ                                                | Untr                                                 | Lova                                                 | MitoQ+<br>Lova                                       | MitoQ                                                |
| <b>IL-1b</b>                  |          | 11.55 ± 1.28                                         | 15.25 ± 0.99                                         | 11.46 ± 1.84                                         | 14.41 ± 1.23                                         | 11.33 ± 0.70                                         | 13.64 ± 2.81                                         | 8.98 ± 2.26                                          | 15.44 ± 0.79                                         |
| <b>IL-2</b>                   |          | 43.64 ± 2.91                                         | 52.43 ± 4.29                                         | 39.39 ± 10.17                                        | 48.87 ± 8.44                                         | 43.93 ± 1.27                                         | 48.27 ± 9.85                                         | 33.07 ± 6.43                                         | 55.29 ± 4.91                                         |
| <b>IL-4</b>                   |          | 15.26 ± 1.64                                         | 19.03 ± 3.67                                         | 13.06 ± 2.70                                         | 20.93 ± 2.39                                         | 17.69 ± 1.04                                         | 20.10 ± 3.58                                         | 14.38 ± 2.19                                         | 22.60 ± 1.37                                         |
| <b>IL-17</b>                  |          | 29.09 ± 0.96                                         | 40.91 ± 4.52                                         | 29.60 ± 8.96                                         | 40.51 ± 4.26                                         | 32.43 ± 1.51                                         | 39.95 ± 6.37                                         | 28.94 ± 5.38                                         | 41.18 ± 4.53                                         |
| <b>IL-6</b>                   |          | 10.9 × 10 <sup>3</sup> ±<br>90.2 × 10 <sup>1</sup>   | 14.0 × 10 <sup>3</sup> ±<br>24.3 × 10 <sup>2</sup>   | 99.8 × 10 <sup>2</sup> ±<br>12.0 × 10 <sup>2</sup>   | 97.0 × 10 <sup>2</sup> ±<br>15.8 × 10 <sup>2</sup>   | 1.16 × 10 <sup>3</sup> ±<br>13.8 × 10 <sup>2</sup>   | 17.00 × 10 <sup>3</sup> ±<br>22.60 × 10 <sup>2</sup> | 76.10 × 10 <sup>2</sup> ±<br>14.90 × 10 <sup>2</sup> | 1.98 × 10 <sup>3</sup> ±<br>62.00 × 10 <sup>2</sup>  |
| <b>IL-8</b>                   |          | 17.90 × 10 <sup>3</sup> ±<br>35.80 × 10 <sup>1</sup> | 21.80 × 10 <sup>3</sup> ±<br>15.50 × 10 <sup>2</sup> | 18.00 × 10 <sup>3</sup> ±<br>36.46 × 10 <sup>2</sup> | 22.75 × 10 <sup>3</sup> ±<br>11.21 × 10 <sup>2</sup> | 21.57 × 10 <sup>3</sup> ±<br>13.12 × 10 <sup>2</sup> | 24.10 × 10 <sup>3</sup> ±<br>35.59 × 10 <sup>2</sup> | 18.03 × 10 <sup>3</sup> ±<br>36.46 × 10 <sup>2</sup> | 22.82 × 10 <sup>3</sup> ±<br>10.72 × 10 <sup>2</sup> |
| <b>IFN<math>\gamma</math></b> |          | 63.0 × 10 <sup>1</sup> ±<br>11.16 × 10 <sup>1</sup>  | 75.87 × 10 <sup>1</sup> ±<br>12.03 × 10 <sup>1</sup> | 67.91 × 10 <sup>1</sup> ±<br>14.13 × 10 <sup>1</sup> | 85.99 × 10 <sup>1</sup> ±<br>92.43                   | 86.69 × 10 <sup>1</sup> ±<br>79.38                   | 95.23 × 10 <sup>1</sup> ±<br>18.57 × 10 <sup>1</sup> | 67.91 × 10 <sup>1</sup> ±<br>14.13 × 10 <sup>1</sup> | 11.61 × 10 <sup>2</sup> ±<br>61.21                   |
| <b>TNF<math>\alpha</math></b> |          | 23.02 × 10 <sup>1</sup> ±<br>72.48                   | 18.41 × 10 <sup>1</sup> ±<br>70.86                   | 17.24 × 10 <sup>1</sup> ±<br>56.92                   | 14.82 × 10 <sup>1</sup> ±<br>67.35                   | 31.18 × 10 <sup>1</sup> ±<br>23.28                   | 36.25 × 10 <sup>1</sup> ±<br>87.98                   | 22.97 × 10 <sup>1</sup> ±<br>25.49                   | 39.82 × 10 <sup>1</sup> ±<br>33.06                   |

Cytokines quantification is expressed in pg/ml.
